# Supplementary figures and images for: Lagged Covariance and Cross-Covariance Operators of Processes in Cartesian Products of Abstract Hilbert Spaces
Source: Preprints.org preprint supplement (doi:10.20944/preprints202105.0277.v1), 2021-05-13

$\varepsilon_0$ 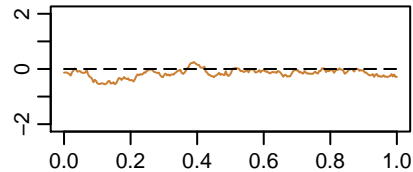 $\varepsilon_1$ 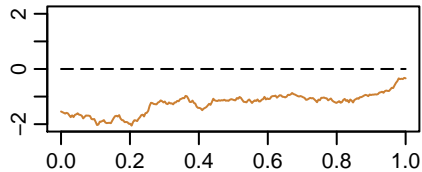 $\varepsilon_2$ 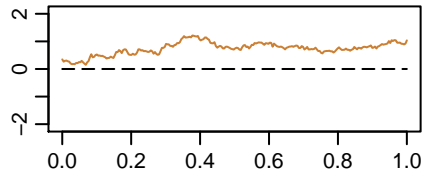 $\varepsilon_3$ 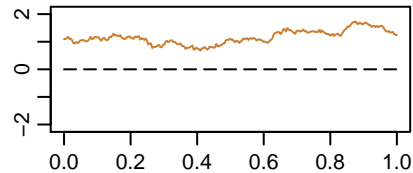 $\varepsilon_4$ 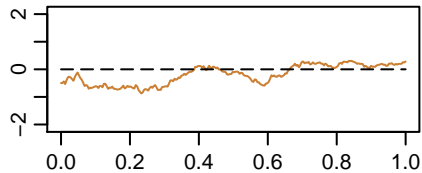 $\varepsilon_5$ 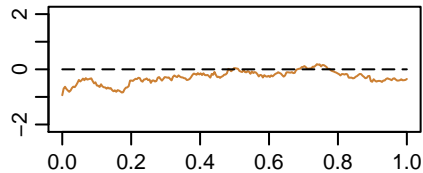

Supplement: Supplementary file 1 [file supplementary]

$(X_3, X_2, X_1)^T$ 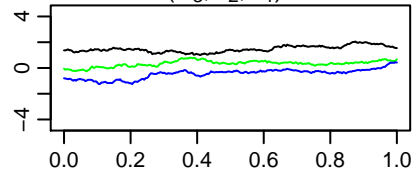 $(X_4, X_3, X_2)^T$ 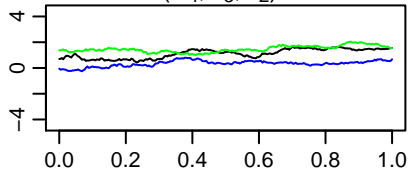 $(X_5, X_4, X_3)^T$ 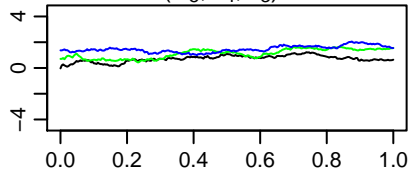 $(Y_3, Y_2)^T$ 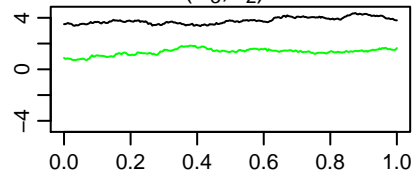 $(Y_4, Y_3)^T$ 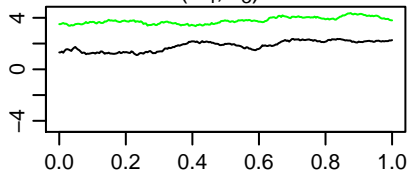 $(Y_5, Y_4)^T$ 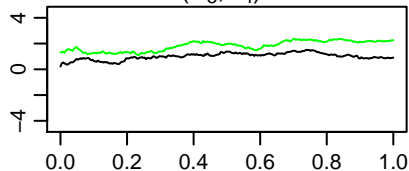

Supplement: Supplementary file 2 [file supplementary]

# Sunshine Duration July 2020 Monthly Totals

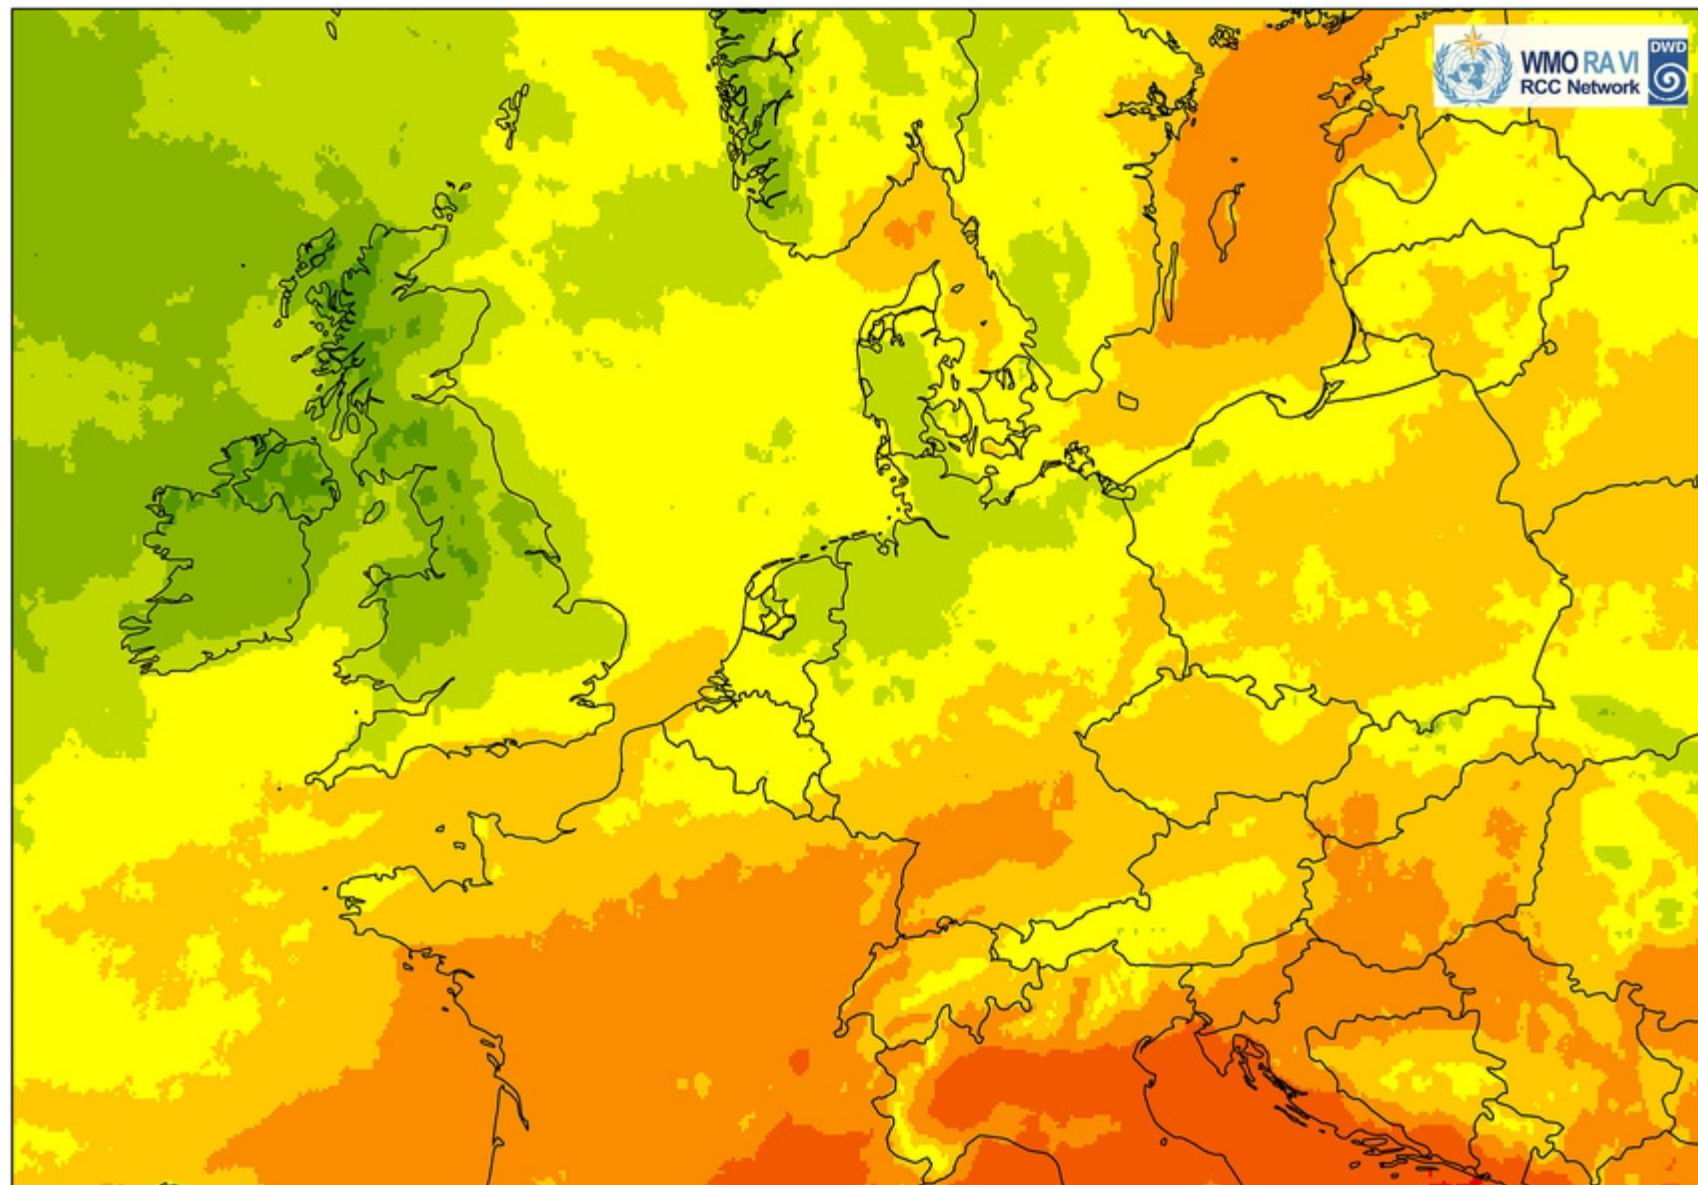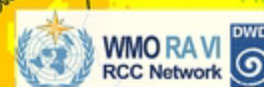

Data: Meteosat

© DWD 02/08/2020

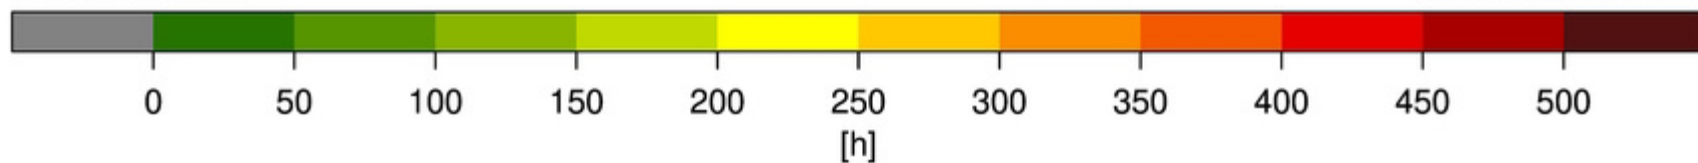

Supplement: Supplementary file 3 [file supplementary]

# Sunshine Duration August 2020 Monthly Totals

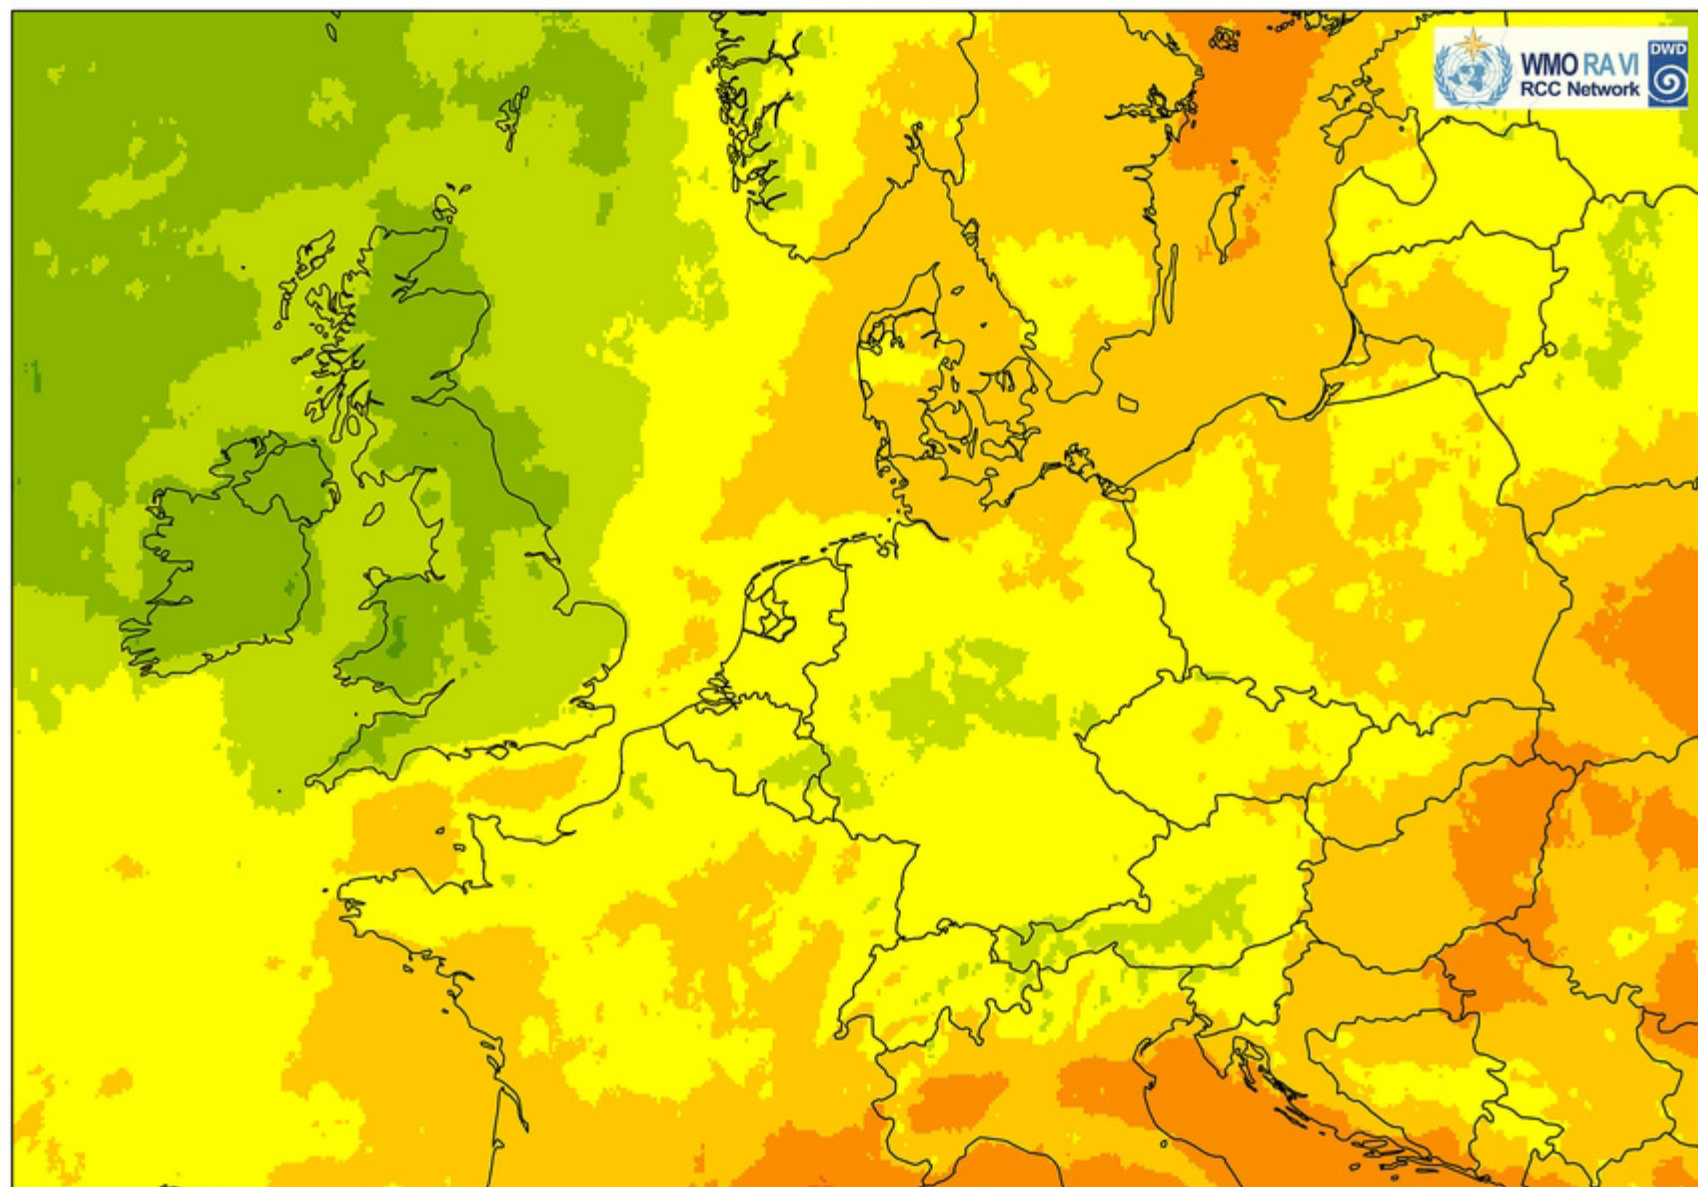

Data: Meteosat

© DWD 02/09/2020

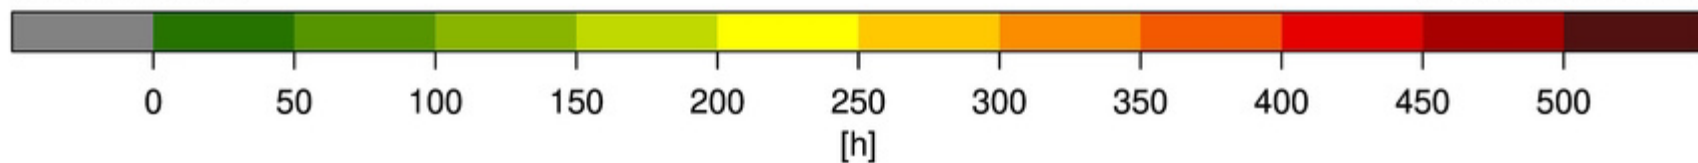

Supplement: Supplementary file 4 [file supplementary]

### June 2020

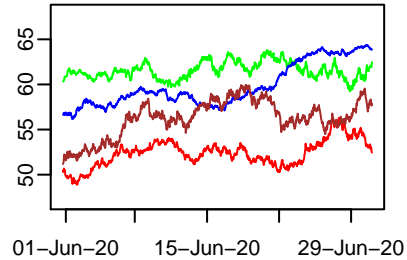

### July 2020

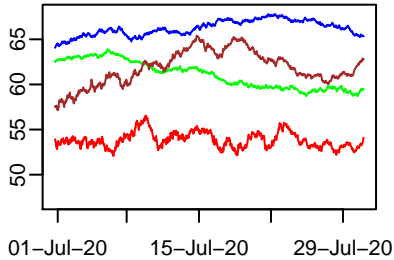

### August 2020

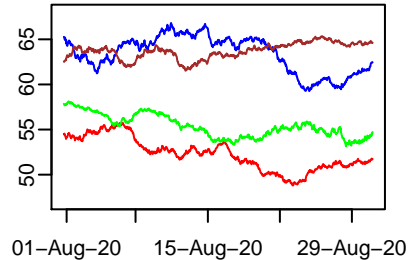

Supplement: Supplementary file 5 [file supplementary]

$X_0, Y_0$ 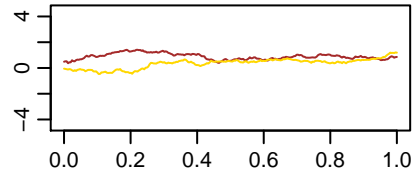 $X_1, Y_1$ 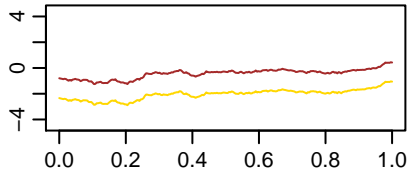 $X_2, Y_2$ 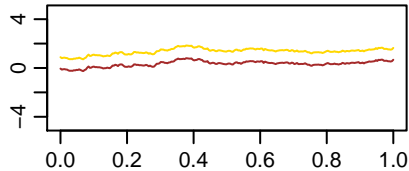 $X_3, Y_3$ 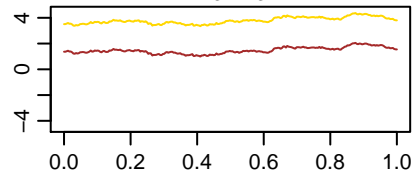 $X_4, Y_4$ 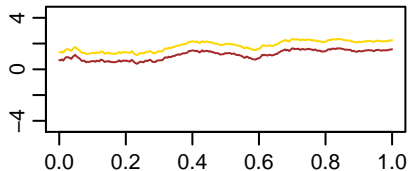 $X_5, Y_5$ 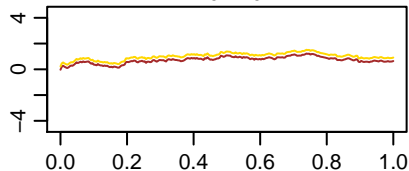

Supplement: Supplementary file 6 [file supplementary]

# Sunshine Duration June 2020

## Monthly Totals

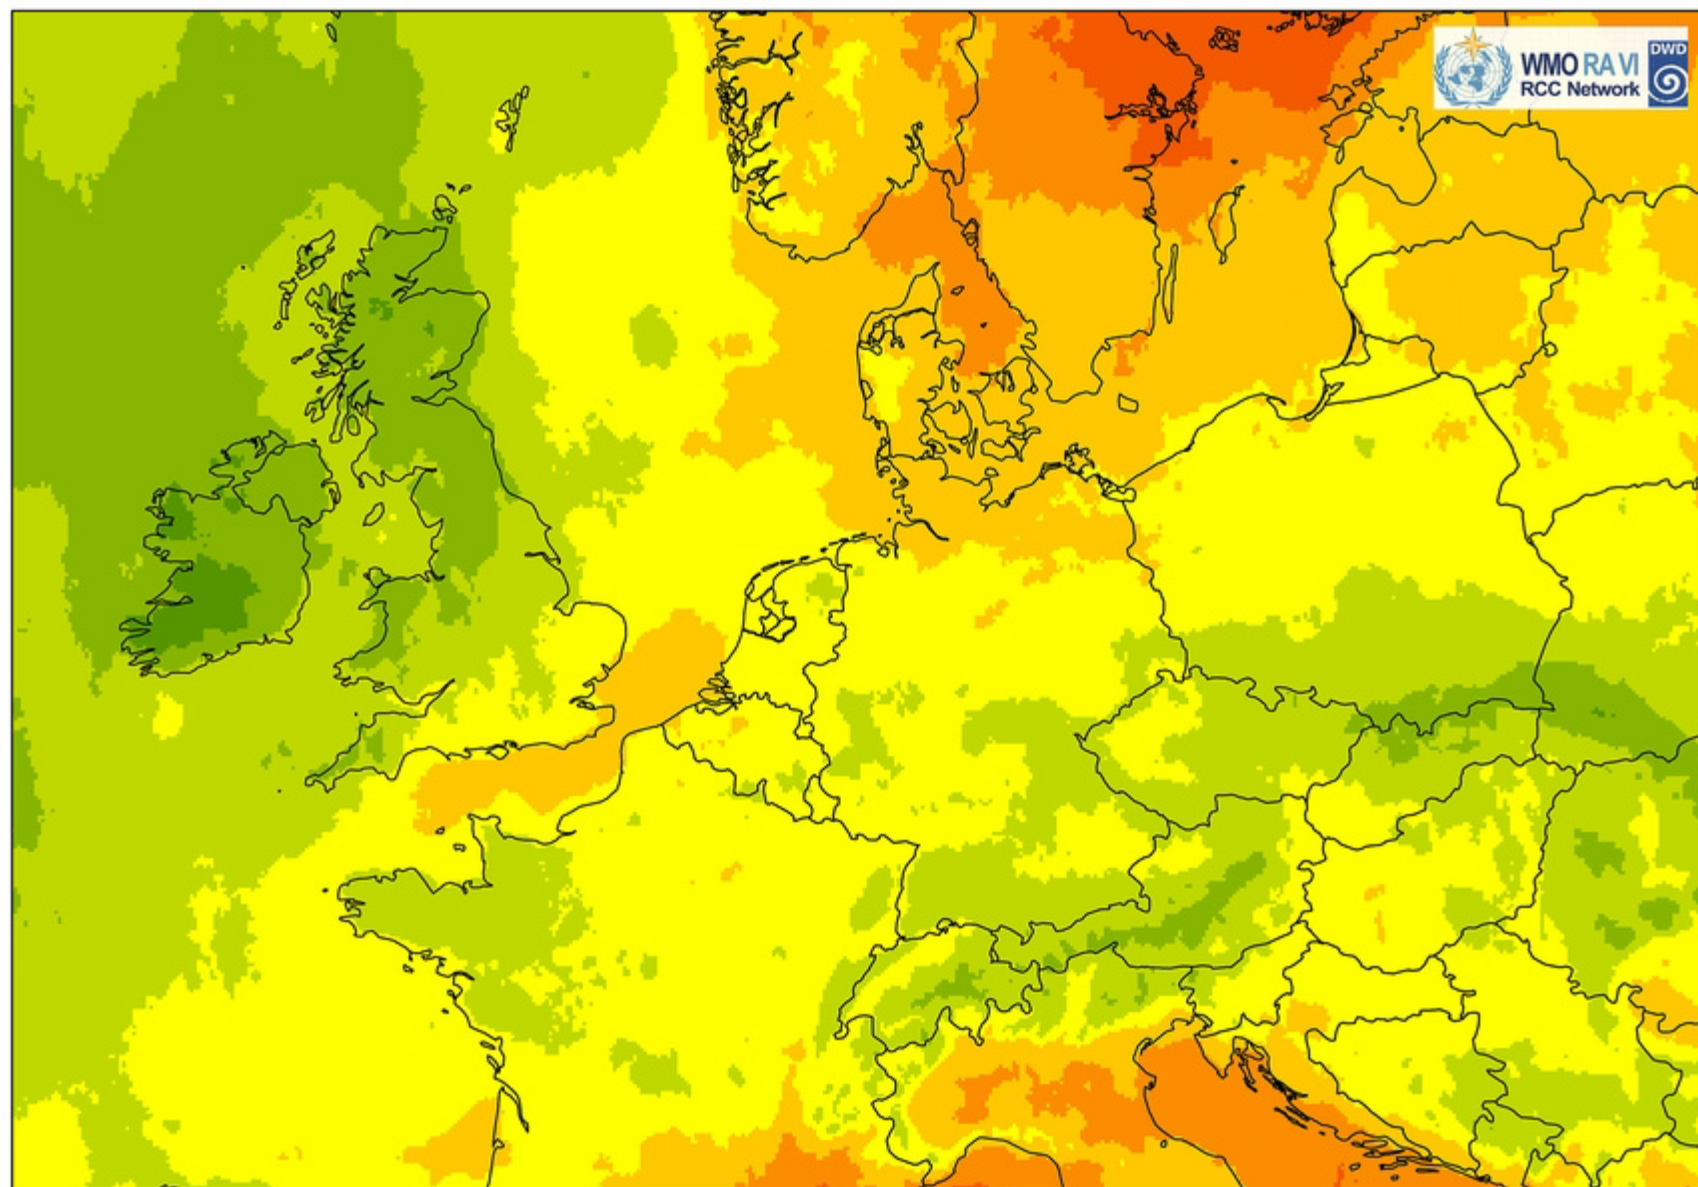

Data: Meteosat

© DWD 02/07/2020

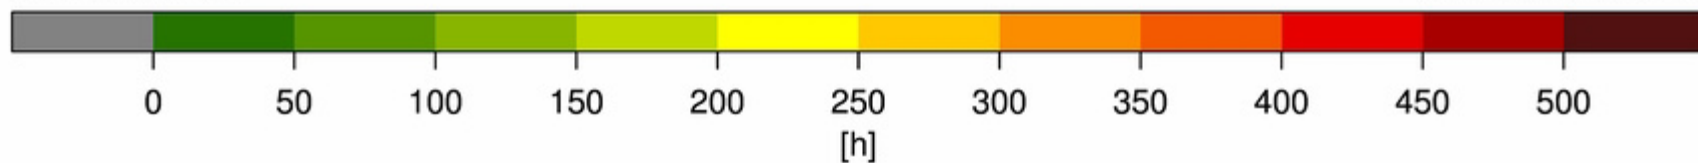

Supplement: Supplementary file 7 [file supplementary]
